# Supplementary material for: Are Australians ready for warning labels, marketing bans and sugary drink taxes? Two cross-sectional surveys measuring support for policy responses to sugar-sweetened beverages
Source: PubMed Central journal article supplement — BMJ Open. 2019 Jun 27;9(6):e027962. doi: 10.1136/bmjopen-2018-027962 (PMC6597645; doi:10.1136/bmjopen-2018-027962), 2019-06-27
Supplement: bmjopen-2018-027962supp001.pdf [file bmjopen-2018-027962supp001.pdf]

Supplementary material.

Table S1. Differences in wording of questions and topics regarding policy options to curb SSB consumption between 2014 and 2017 surveys

| 2014 State HOS survey <sup>i</sup>                                                                                                                                                                                  | 2017 National Survey <sup>ii</sup>                                                                                                                                                                                                                          |
|---------------------------------------------------------------------------------------------------------------------------------------------------------------------------------------------------------------------|-------------------------------------------------------------------------------------------------------------------------------------------------------------------------------------------------------------------------------------------------------------|
| INTRO: Sugary drinks or sugar-sweetened drinks are non-alcoholic water based drinks with added sugar, including soft drinks, energy drinks, fruit drink, sports drinks and cordial. Are you in favour or against... | INTRO: This question relates to sugary drinks that are non-alcoholic water based drinks with added sugar, including soft drinks, energy drinks, sports drink, fruit flavoured drinks, all types of fruit juice and cordial. Are you in favour or against... |
| 1. The Government taxing drinks that are high in added SUGAR?                                                                                                                                                       | A1.The Government taxing drinks that are high in added SUGAR?                                                                                                                                                                                               |
| Not assessed                                                                                                                                                                                                        | A2.The Government taxing drinks that are high in added SUGAR and using the money for obesity prevention?                                                                                                                                                    |
| 2. Government funded TV campaigns warning about the health effects of obesity                                                                                                                                       | B.Government funded TV campaigns <u>educating people about</u> the health effects of sugary drinks?                                                                                                                                                         |
| 3. Restrictions on the sales of sugary drinks at schools                                                                                                                                                            | <u>C.Banning the sale of all</u> sugary drinks at schools?                                                                                                                                                                                                  |
| 4. Restrictions on the marketing of sugary drinks to children through websites and computer games?                                                                                                                  | <u>D.Banning the marketing of sugary drinks on digital platforms popular with children such as Apps, websites, games, Facebook, Snapchat?</u>                                                                                                               |
| 6. Restriction on advertising sugary drinks to children on television                                                                                                                                               | <u>E.Banning sugary drink advertising at times when large numbers of children are watching TV?</u>                                                                                                                                                          |
| 7. Written labelling on sugary drinks warning about the risk of diabetes, obesity and tooth decay                                                                                                                   | F1. <u>Text warning labels</u> on sugary drinks about the risk of diabetes, obesity and tooth decay?                                                                                                                                                        |
| Not assessed                                                                                                                                                                                                        | F2.Text warning labels on vending machines and other places where drinks are sold?                                                                                                                                                                          |
| Not assessed                                                                                                                                                                                                        | F3.Text warning labels on sugary drink advertisements such as billboards and television?                                                                                                                                                                    |
| 8. Graphic health warnings on sugary drinks a bit like those on cigarettes                                                                                                                                          | G.Graphic health warnings on sugary <u>drink containers about the risks of diabetes, obesity and tooth decay</u> , a bit like those on cigarettes                                                                                                           |
| 5. Restrictions on sugary drink sponsorship of children's sport?                                                                                                                                                    | Not assessed                                                                                                                                                                                                                                                |

Note. Underlining depicts differences in wording. Shading indicates the initiative was not assessed in that given year. Response options: Strongly against, somewhat against, neither in favour or against, somewhat in favour, strongly in favour, don't know, refused.

<sup>i</sup> Number indicates order that interviewer read out the statement.

<sup>ii</sup> Statements were randomised; Questions A and F remained grouped and presented in the same order.

Table S2. The order and wording of questions for knowledge and risk factors (SSB National Survey)

| Topic                                          | Question                                                                                                                                                                                                                                                                                                                                                                                                                                                                                                                                                                    | Response                                                                                                                                                                    |
|------------------------------------------------|-----------------------------------------------------------------------------------------------------------------------------------------------------------------------------------------------------------------------------------------------------------------------------------------------------------------------------------------------------------------------------------------------------------------------------------------------------------------------------------------------------------------------------------------------------------------------------|-----------------------------------------------------------------------------------------------------------------------------------------------------------------------------|
| C) Risk factor:<br>Sugary drink<br>consumption | <p>The next series of questions ask about <b>sugary drinks</b>. This means soft drinks like coke and lemonade, energy drinks like Red Bull, sports drinks like Gatorade, fruit flavoured drinks like Schweppes mineral waters and mixers, all types of fruit juice and cordial. It excludes artificially sweetened drinks and those mixed with alcohol.</p> <p>1. During the <b>past 7 days</b>, on how many days did you drink at least one 250ml cup of a sugary drink?</p> <p>2. On days when you do drink sugary drinks, how many cups per day do you usually have?</p> | <p>Days (Range 0-7):_____</p> <p>Cups per day (range 1-40)_____</p>                                                                                                         |
| E) Knowledge of<br>health effects              | <p>1. If an <b>average adult</b> drank a sugary drink every day, would they be likely or unlikely to have health problems later in life?</p> <p>2. If a <b>child</b> drank a sugary drink every day, would they be likely or unlikely to have health problems later in life?</p>                                                                                                                                                                                                                                                                                            | <p>1. Very unlikely<br/>2. Somewhat unlikely<br/>3. Neither likely or unlikely<br/>4. Somewhat likely<br/>5. Very likely<br/>6. (Don't know/Can't say)<br/>7. (Refused)</p> |
| F) Risk factor:<br>Body Mass Index<br>(BMI)    | <p>1. What is your height without shoes?<br/>2. What is your weight (undressed) in the morning?</p>                                                                                                                                                                                                                                                                                                                                                                                                                                                                         | <p>Centimetres/feet and inches:_____</p> <p>Kilograms/stone and<br/>pounds/pounds:_____</p> <p>(BMI calculated using formula:<br/>kg/m<sup>2</sup>)</p>                     |
| G) Policy support<br>–see Table S1             |                                                                                                                                                                                                                                                                                                                                                                                                                                                                                                                                                                             |                                                                                                                                                                             |

Other topics that were included but are reported elsewhere: A) Parental status; B) Knowledge of sugar guidelines; C) Consumption of soft drink, energy drinks, sports drinks, fruit juice, artificially sweetened soft drinks, bottled water, alcoholic beverages; D) Knowledge about sugar intake in sugary drinks; E) Knowledge of illness associated with drinking soft drinks and artificially sweetened soft drinks; relative healthiness of sports drinks, fruit juice and artificially sweetened drinks compared to soft drinks; F) Availability of soft drinks, fruit juice and artificially sweetened soft drinks in the home; Take away food consumption; frequency of physical activity; sleep; current health conditions.
